# Supplementary material for: Gadolinium-Based Magnetic Resonance Theranostic Agent with Gallic Acid as an Anti-Neuroinflammatory and Antioxidant Agent
Source: MDPI journal article supplement (doi:10.3390/antiox13020204), 2024-02-05
Supplement: s1 [file s1]

## Supplementary Information

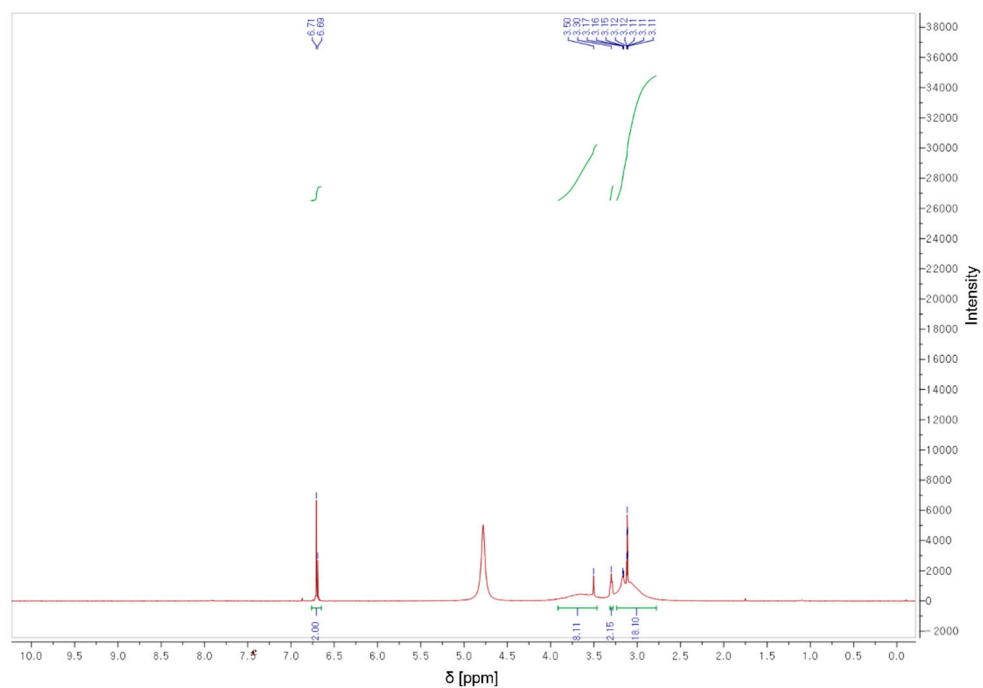

Figure S1. <sup>1</sup>H NMR spectrum of compound 2.

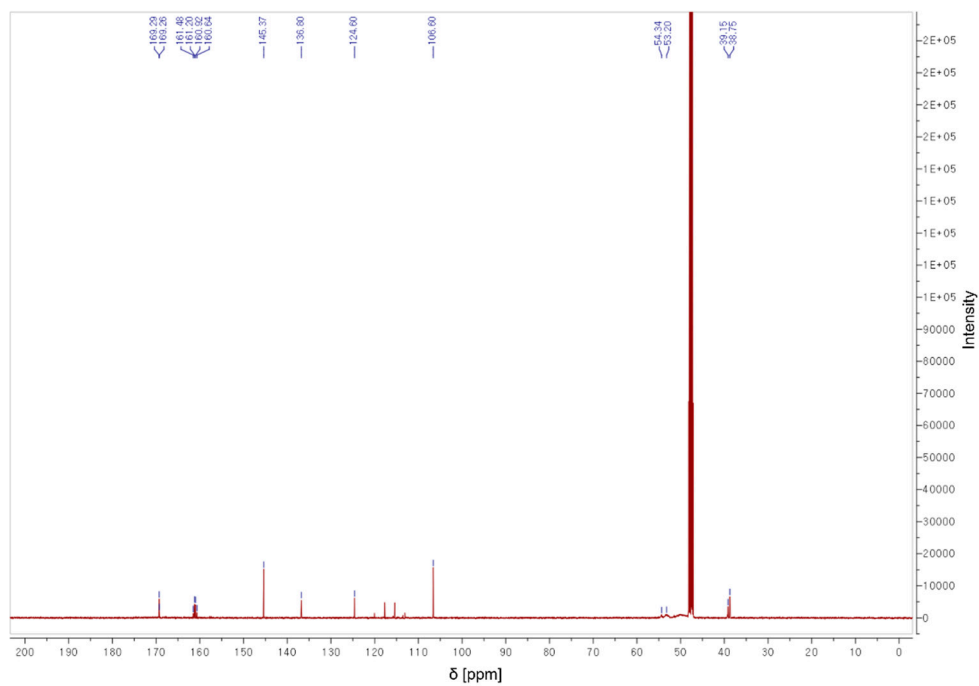

Figure S2. <sup>13</sup>C NMR spectrum of compound 2.

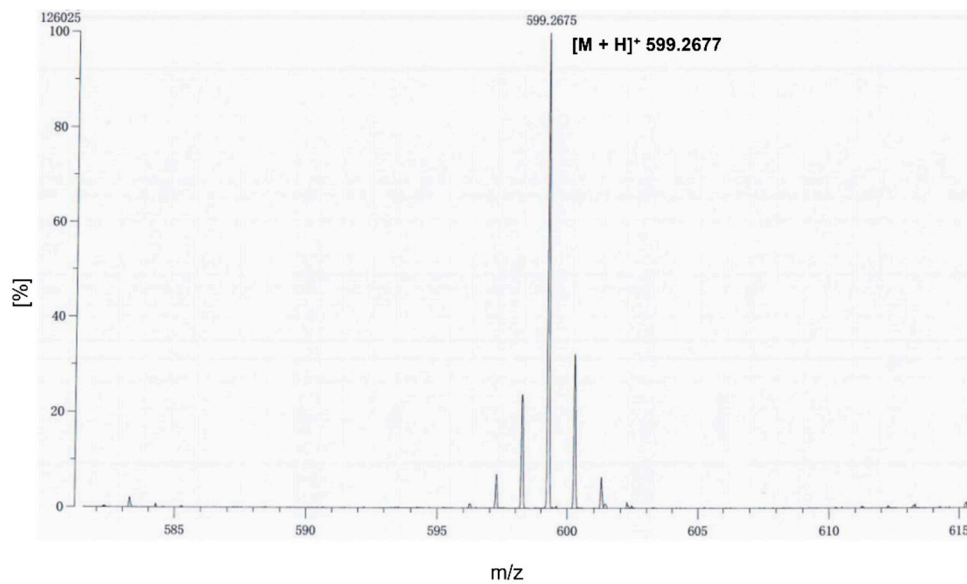

**Figure S3.** HR-FAB-mass spectrum of compound 2.

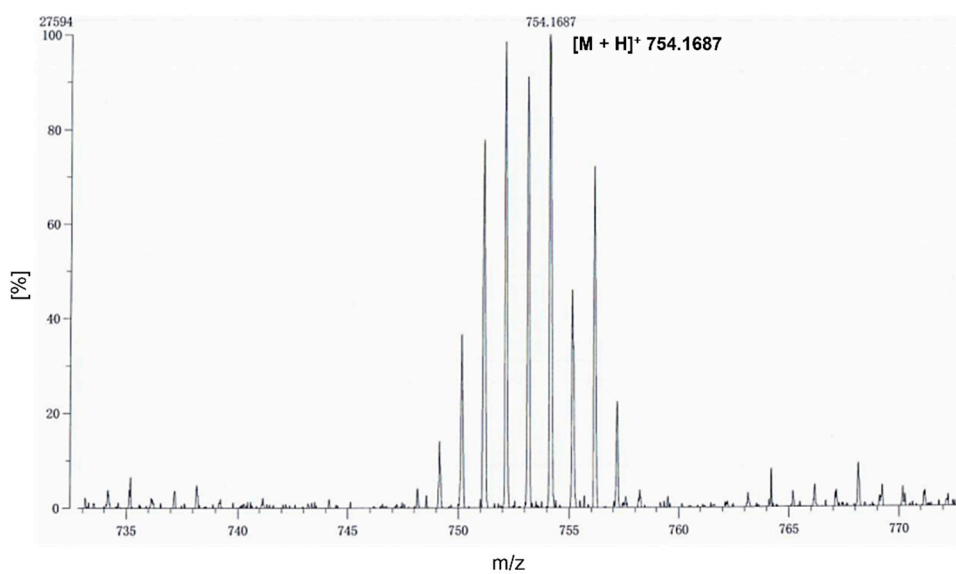

**Figure S4.** HR-FAB-mass spectrum of 3, Gd-Ga.

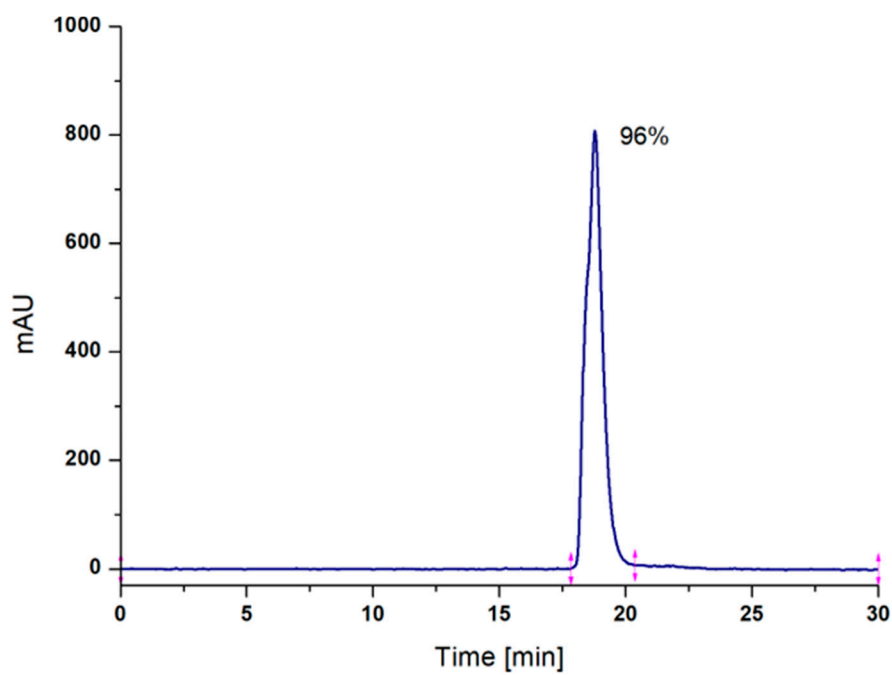

**Figure S5.** HPLC spectrum of 3, Gd-Ga.

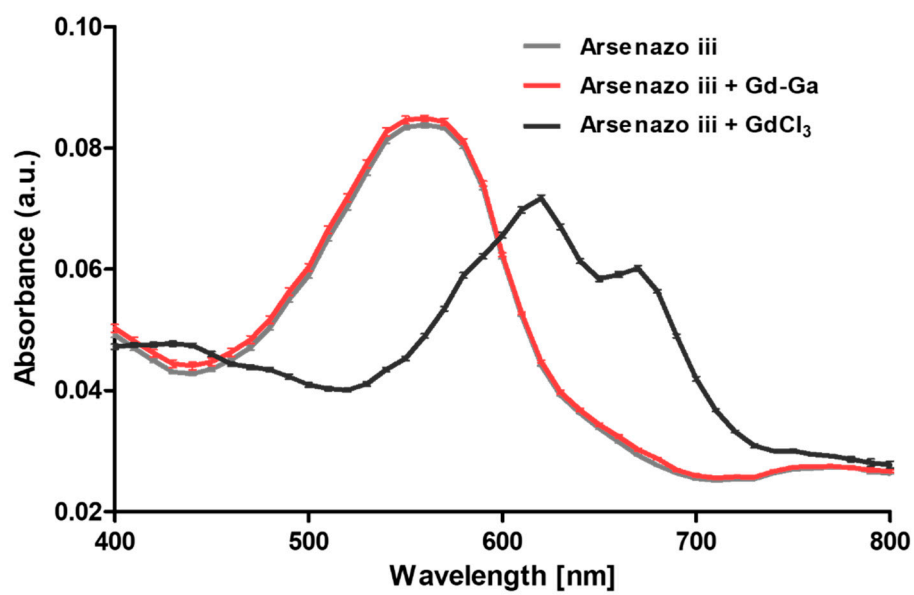

Figure S6. Free Gd ion test of Gd-Ga.

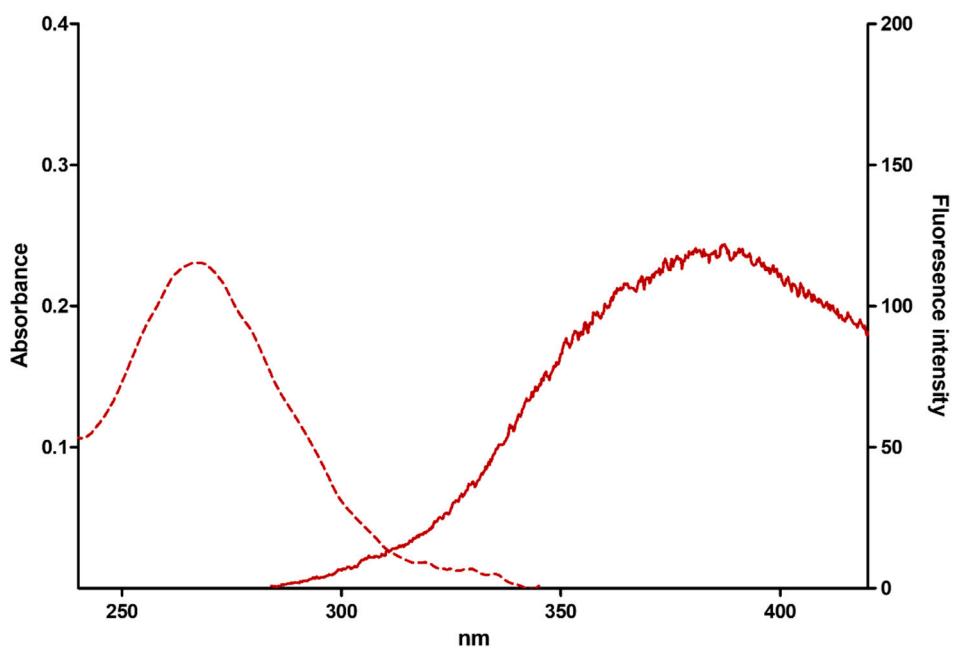

Figure S7. Absorption and fluorescence spectra of Gd-Ga in water.  $\lambda_{\text{ex}} = 250$  nm.

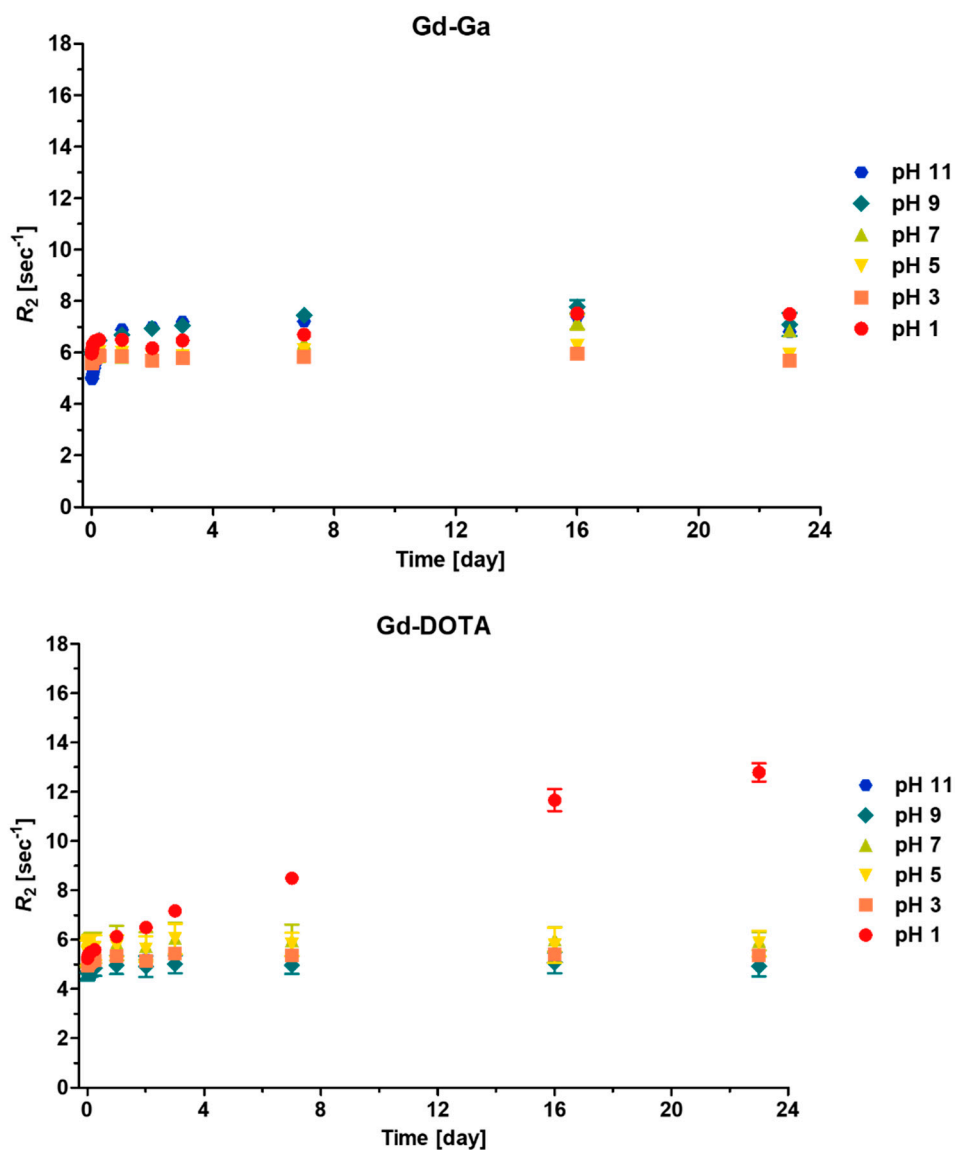

Figure S8. pH stability of Gd-Ga and Gd-DOTA, a commercial MR contrast agent.

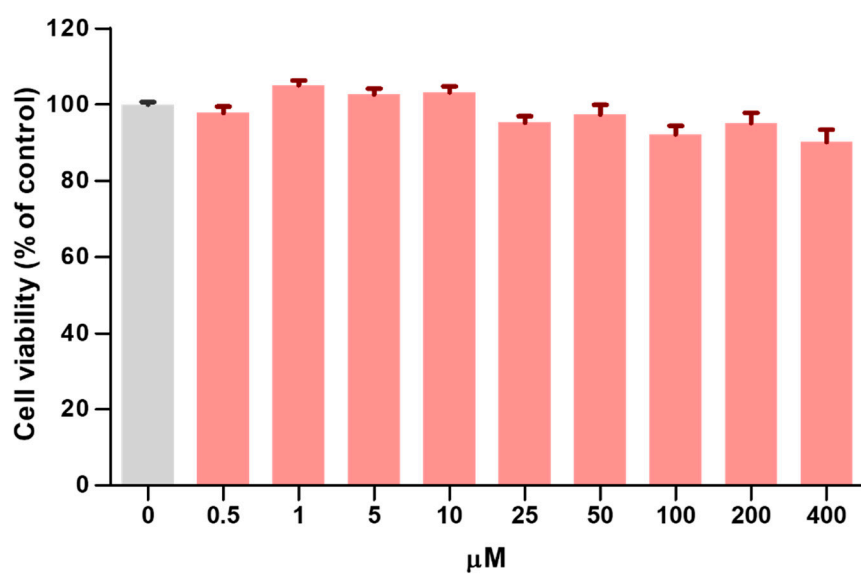

Figure S9. Cell viability of BV-2 cells in various concentration of Gd-Ga.

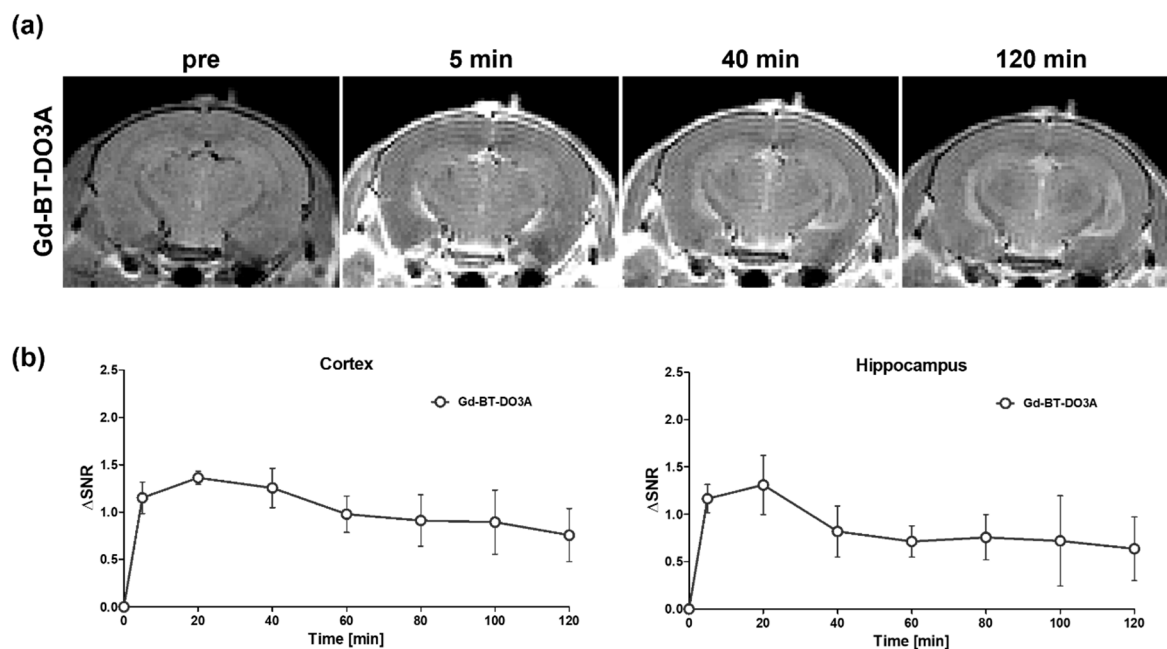

**Figure S10.** In vivo T<sub>1</sub>-weighted 9.4 T MR images of LPS-induced mouse models injected Gd-BT-DO3A. (a) Axial mouse brain images. (b) The SNR differences in the cortex and hippocampus areas for T<sub>1</sub>-weighted images.

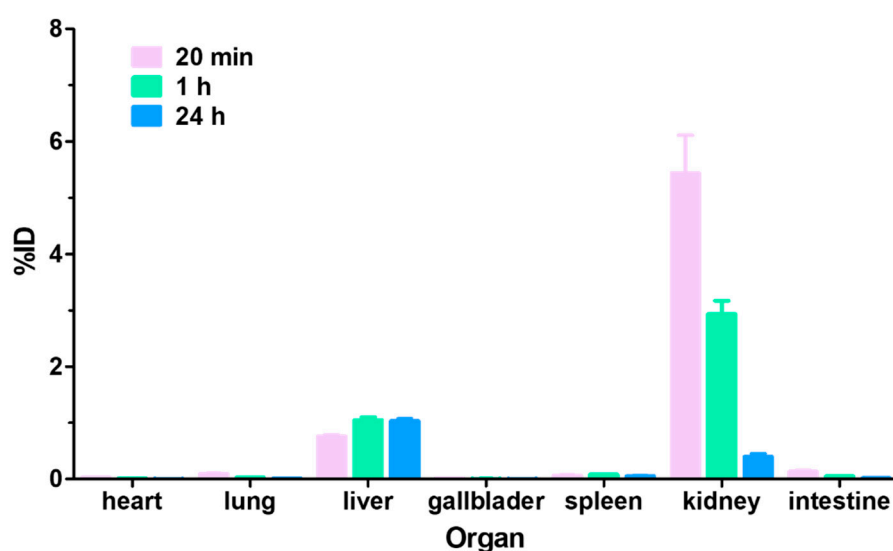

**Figure S11.** Biodistribution of Gd-Ga in normal C57BL/6J mice.

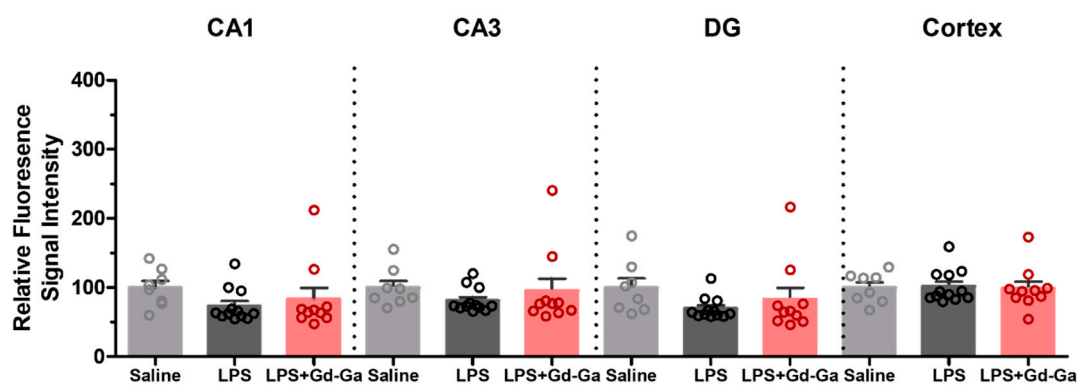

**Figure S12.** Fluorescence intensity of immunofluorescence staining for GFAP in the cortex and hippocampus of LPS-induced mouse brain.

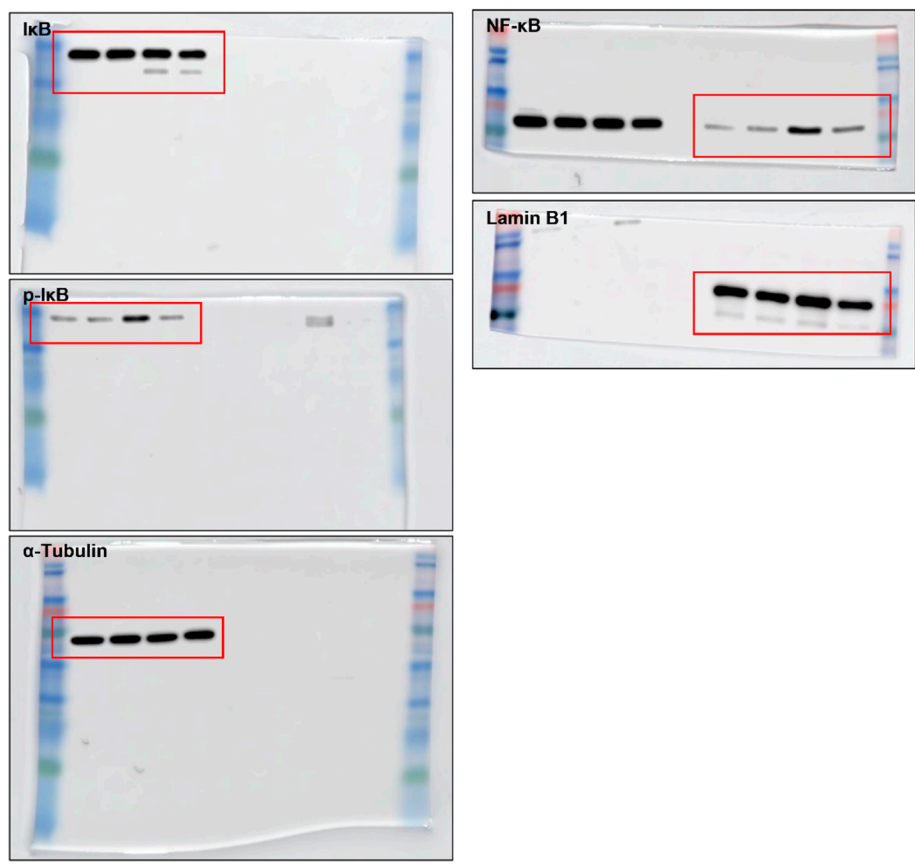

Figure S13. the source data of western blot in Figure 5.

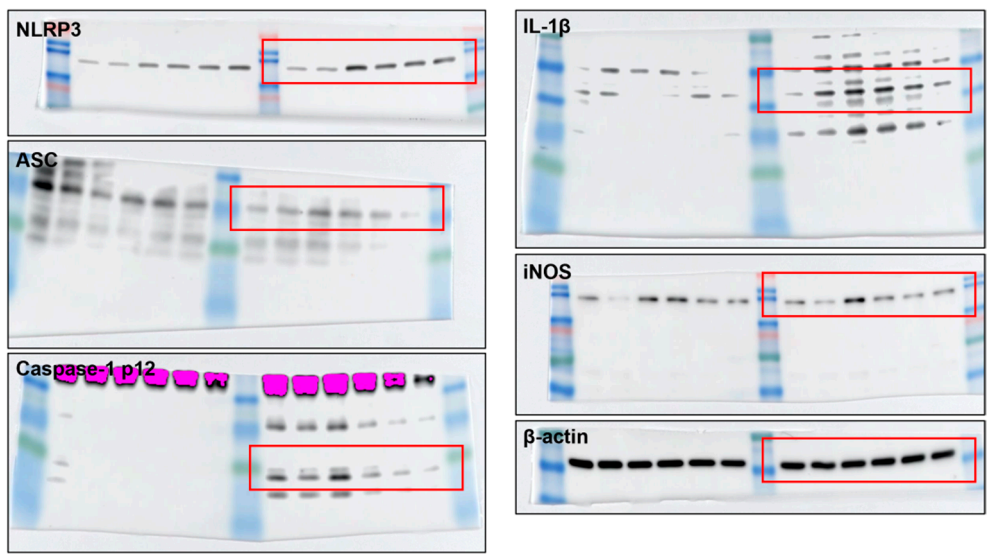

Figure S14. the source data of western blot in Figure 6.

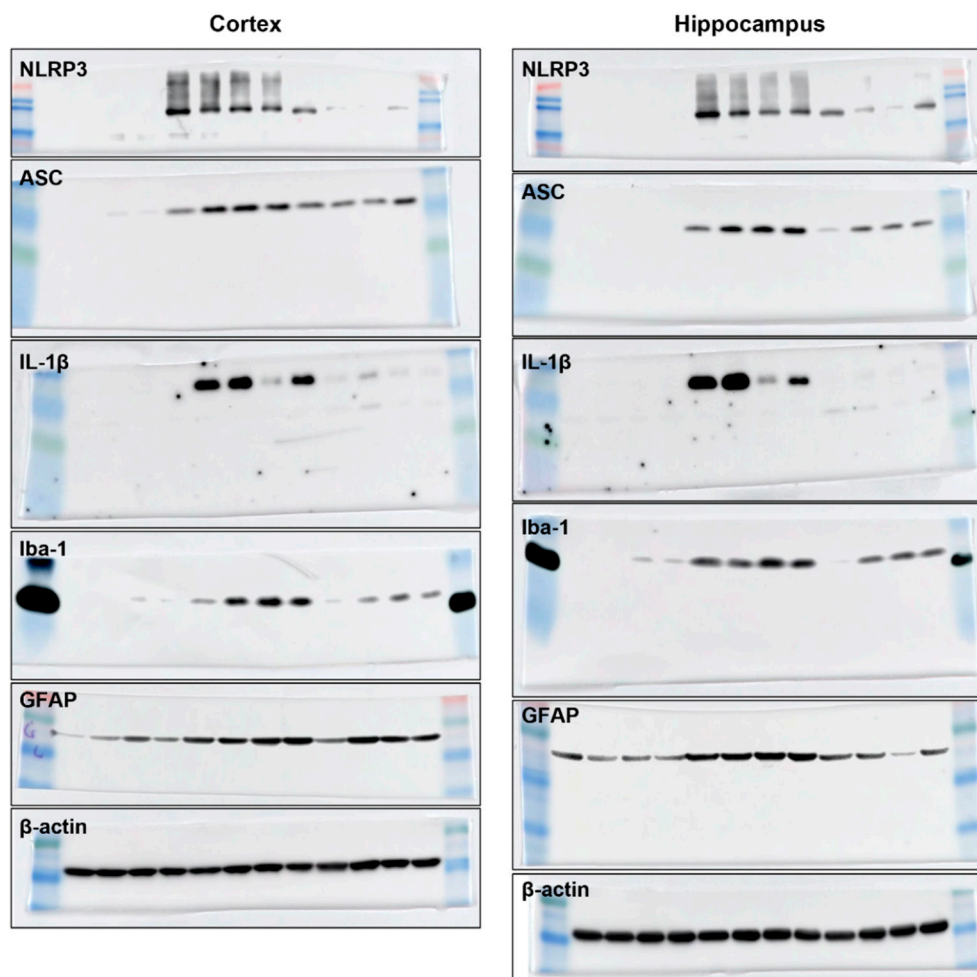

**Figure S15.** the source data of western blot in Figure 9.
